# Supplementary material
Source: Springer Nature journal article supplement (https://www.springermedizin.de/resource/supplementary/12888_2011_1001_MOESM2_ESM.pdf/9479454)
Supplement: MOESM2 [file 9479454]

End of titration  
Week 2

Session One:  
Psychoeducation

Weeks 4 - 14

Biweekly  
problem focused  
therapy

Week 15  
Week 20

Booster

Booster
